# Supplementary material for: De novo design of modular protein hydrogels with programmable intra- and extracellular viscoelasticity
Source: PubMed Central journal article supplement — Proc Natl Acad Sci U S A. 2024 Jan 30;121(6):e2309457121. doi: 10.1073/pnas.2309457121 (PMC10861882; doi:10.1073/pnas.2309457121), 2024-01-30
Supplement: pnas.2309457121.sapp.pdf [file pnas.2309457121.sapp.pdf]

## Supplementary Information

### De novo design of modular protein hydrogels with programmable intra- and extracellular viscoelasticity

Rubul Mout<sup>1,2,3,#,\*</sup>, Ross C. Bretherton<sup>4,5,6,7,8,#</sup>, Justin Decarreau<sup>1,2</sup>, Sangmin Lee<sup>1,2</sup>, Nicole Gregorio<sup>4,5,6,7,8</sup>, Natasha I. Edman<sup>1,2,9,10</sup>, Maggie Ahlrichs<sup>1,2</sup>, Yang Hsia<sup>1,2</sup>, Danny D. Sahtoe<sup>1,2,11</sup>, George Ueda<sup>1,2</sup>, Alee Sharma<sup>12</sup>, Rebecca Schulman<sup>13,14</sup>, Cole A. DeForest<sup>2,4,5,6,7,8\*</sup>, David Baker<sup>1,2,11\*</sup>

<sup>1</sup>Department of Biochemistry, University of Washington, Seattle, WA 98195

<sup>2</sup>Institute for Protein Design, University of Washington, Seattle, WA 98195

<sup>3</sup>Stem Cell Program at Boston Children's Hospital, Harvard Medical School, Boston, MA 02115

<sup>4</sup>Department of Bioengineering, University of Washington, Seattle, WA 98195

<sup>5</sup>Department of Chemical Engineering, University of Washington, Seattle, WA 98195

<sup>6</sup>Institute for Stem Cell and Regenerative Medicine, University of Washington, Seattle, WA 98195

<sup>7</sup>Department of Chemistry, University of Washington, Seattle, WA 98195

<sup>8</sup>Molecular Engineering & Sciences Institute, University of Washington, Seattle, WA 98195

<sup>9</sup>Molecular and Cellular Biology Graduate Program, University of Washington, Seattle, WA 98195

<sup>10</sup>Medical Scientist Training Program, University of Washington, Seattle, WA 98195

<sup>11</sup>Howard Hughes Medical Institute, University of Washington, Seattle, WA 98195

<sup>12</sup>College of Professional Studies, Northeastern University, Boston, MA 02115

<sup>13</sup>Department of Chemical and Biomolecular Engineering, Johns Hopkins University, Baltimore, MD 21218

<sup>14</sup>Department of Computer Science, Johns Hopkins University, Baltimore, MD 21218

#These authors contributed equally: Rubul Mout, Ross Bretherton

\*Corresponding authors. E-mail: Rubul Mout: rubul.mout@childrens.harvard.edu; Cole A. DeForest: profcole@uw.edu; David Baker: dabaker@uw.edu

## Supplementary Movie Legends

Supplementary movie 1: Fluorescence recovery after photobleaching (FRAP) imaging of the noncovalent C2-5-HA x C5-5-HB-GFP droplet in HeLa cell.

Supplementary movie 2: FRAP imaging of C5-5-HB-GFP alone in HeLa cell.

Supplementary movie 3: FRAP imaging of covalent C2-5-SC x C5-5-ST-GFP gel in HeLa cell.

Supplementary movie 4: FRAP imaging of C5-5-ST-GFP alone in HeLa cell.

Supplementary movie 5: FRAP imaging of covalent C2-1-SC x C5<sub>2H</sub>-1-ST-GFP in HeLa cell.

Supplementary movie 6: FRAP imaging of covalent C2-1-SC x C5<sub>7H</sub>-1-ST-GFP in HeLa cell.

Supplementary movie 7: FRAP imaging of covalent C2-1-SC x C5<sub>15H</sub>-1-ST-GFP in HeLa cell.

## Supplementary Figures

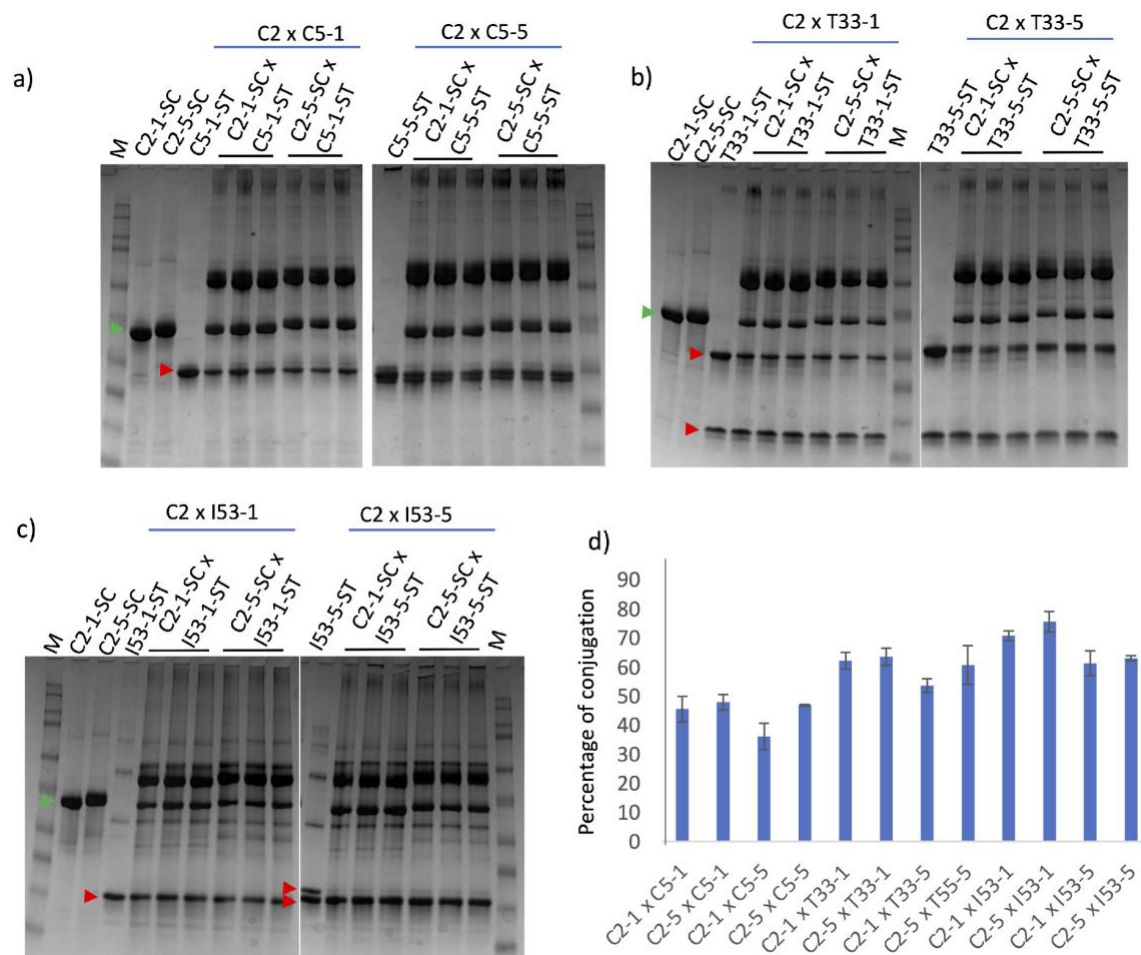

**Figure S1.** SDS-PAGE gel showing covalent crosslinking between SpyCatcher-modified C2 (green arrow) and SpyTagged higher-order oligomers (red arrow). After hydrogel formation between the respective constructs, samples were dissolved in denaturing (SDS) running buffer and boiled before running on a SDS-PAGE. Results show that upon covalent network formation through SpyLigation, the conjugated oligomers shift to higher position on the gel. a) C2 x C5; b) C2 x T33; and c) C2 x I53 hydrogel systems. Note that T33 and I53 oligomers are constituted of two components and hence two bands are observed in the gel (marked with red arrows). However, in I53-1-ST, both the components have identical sizes and the two bands are not distinguishable. Hydrogels of each formulation (*i.e.*, C2 x C5, C2 x T33, C2 x I53) were run in

triplicate (a, b, c). M: standard protein ladder. d) Quantitative estimation of hydrogel network formation (conjugation efficiency) between the components in each hydrogel. Briefly, the SDS-PAGE images in a, b, and c were subjected to image analysis to quantify the percentage conjugation efficiency. Percentage of unreacted C2-1 or C2-5 in each gel was estimated using ImageJ to determine the percentage conjugation. Results show that the conjugation efficiency varies between ~35% to ~75% among the different constructs.

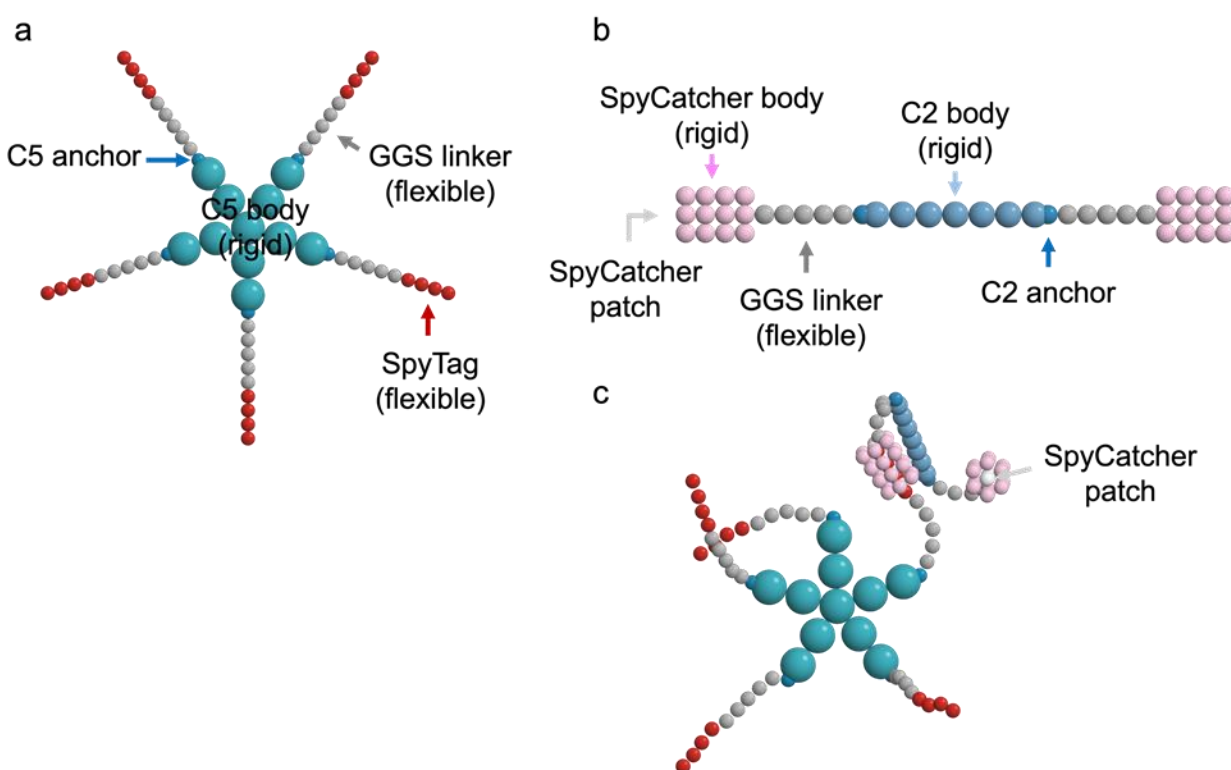

**Figure S2.** MD simulation model with representative examples C5-5-ST and C2-5-SC. (a) C5 consists of C5 body, C5 anchor, GGS linker, and SpyTag, and their coordinates are listed in Table S1. (b) C2 consists of C2 body, C2 anchor, GGS linker, SpyCatcher body, and SpyCatcher patch. (c) An attractive potential is applied between SpyTag and SpyCatcher patch so that the SpyTag can go into the SpyCatcher body.

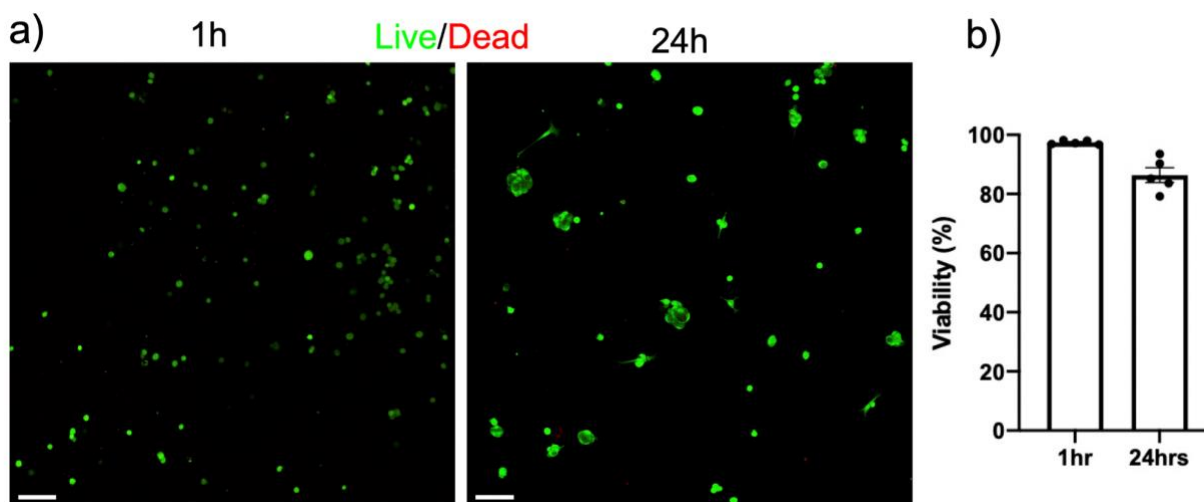

**Figure S3:** Cell encapsulation of 10T1/2 fibroblast cells in C2-5-SC x C5-5-ST gels. a) Cells were encapsulated and grown for 1 and 24h. Cell viability was assessed by LIVE/DEAD staining and confocal imaging. b) Percentage of cell viability was quantified by CellProfiler. Scale bar 20  $\mu\text{m}$ .

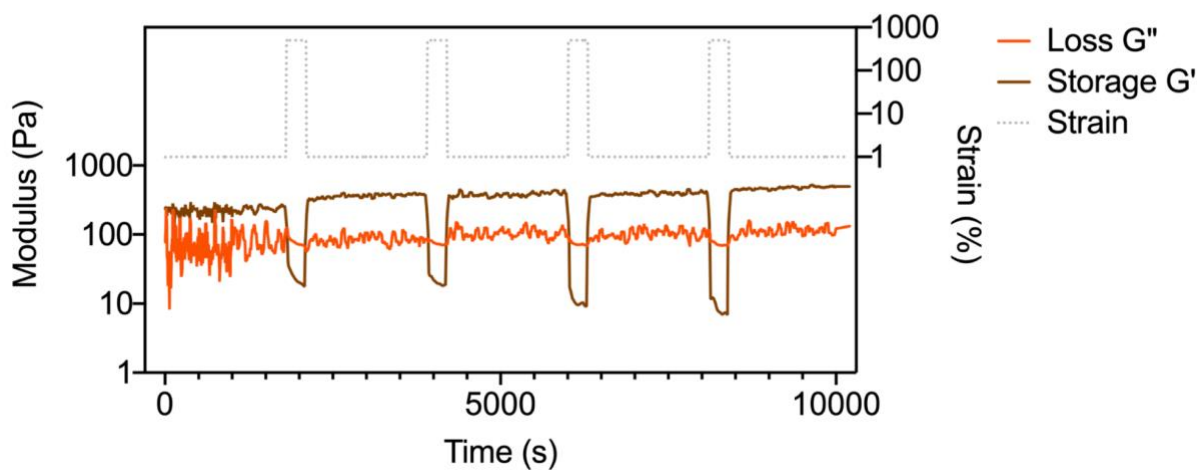

**Figure S4.** Self-healing properties of C2-5-HA x C5-5-HB noncovalent protein networks mediated by LHD101 heterodimer. The gel networks were capable of self-healing over multiple cycles of 500% strain.

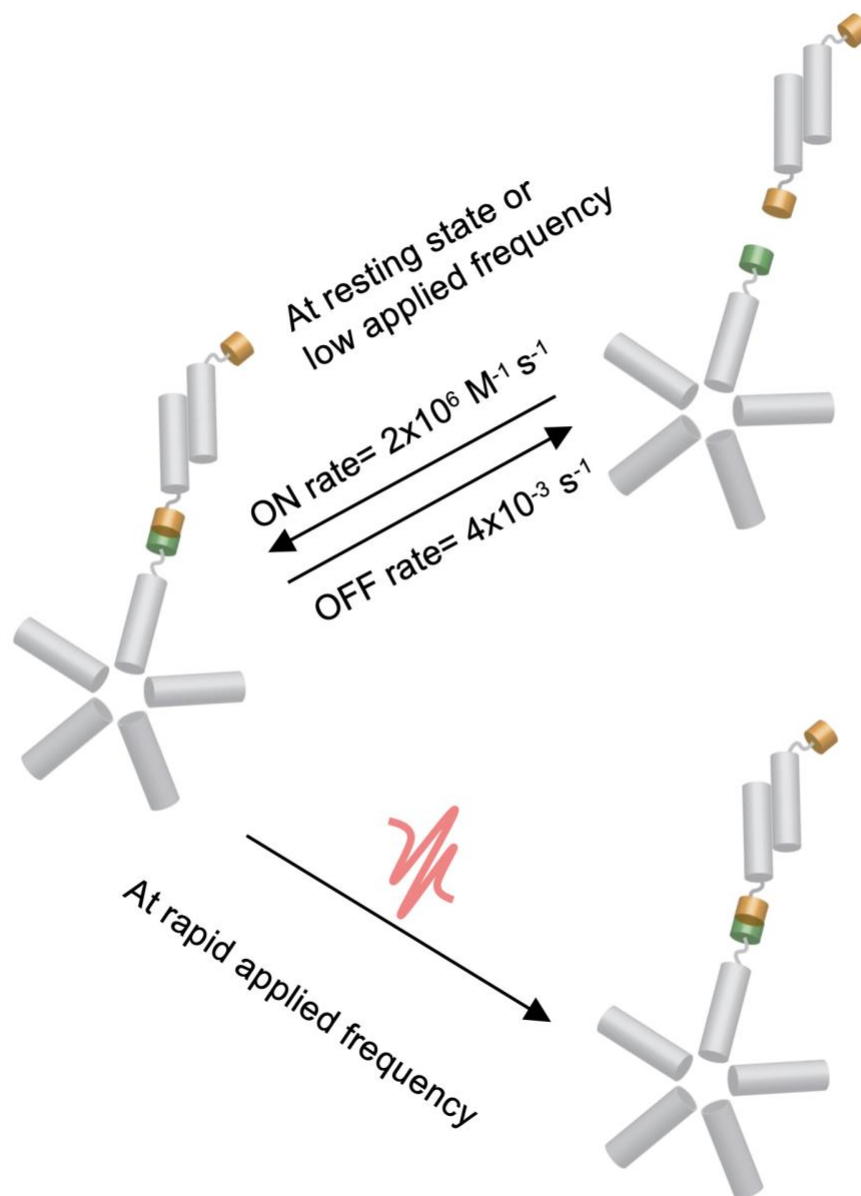

**Figure S5.** Model showing the noncovalent assembly between C2-5-HA and C5-5-HB at a resting state or at a state when the applied frequency is low vs when the applied frequency is rapid. At the resting state, due to the rapid ON/OFF rate of the heterodimer units, the material behaves like a liquid, whereas, if the assembly exerts a deformation frequency faster than the heterodimer LHD101A:B (HA and HB) ON/OFF rate then the intermolecular interactions get 'locked', and therefore behaves like a gel.

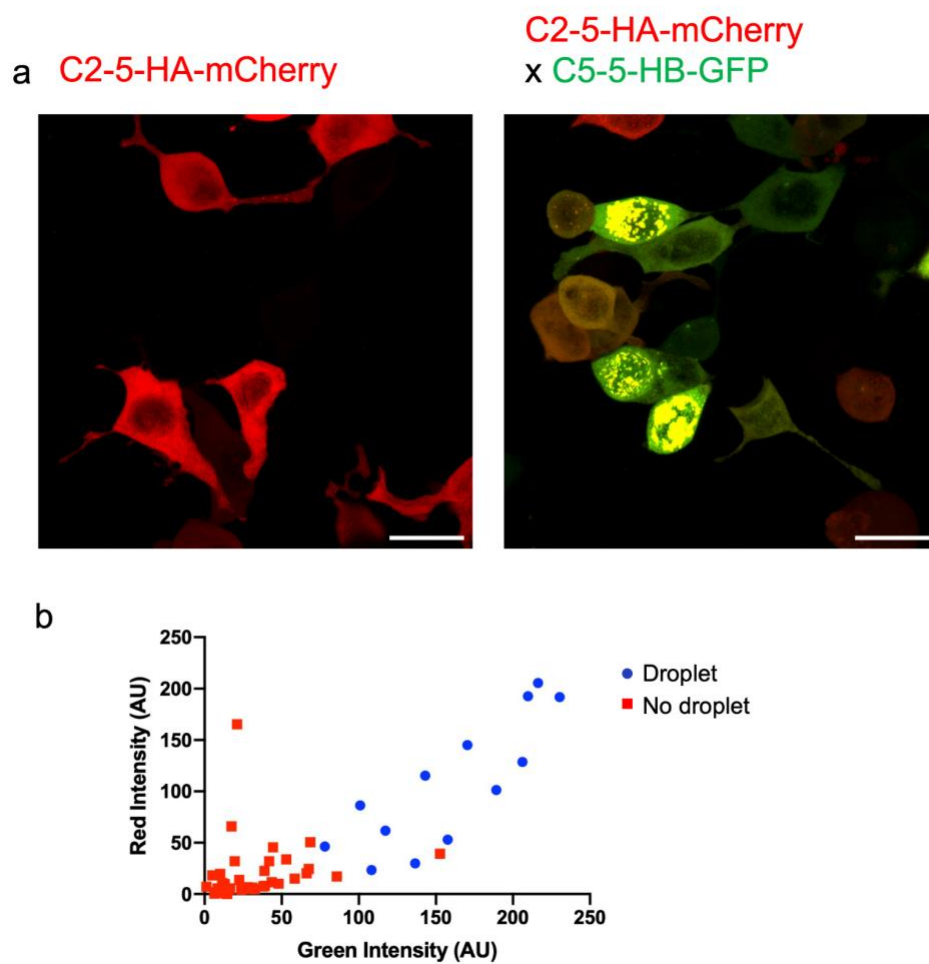

**Figure S6.** The phase transition from freely diffused constituents to droplet punctae. a) Expression of C2-5-HA-mCherry alone or the coexpression of C2-5-HA-mCherry and C2-5-HB-GFP. b) Droplet formation occurred only at a certain threshold expression of both the components, measured through red (mCherry) and green (GFP) fluorescent intensity.

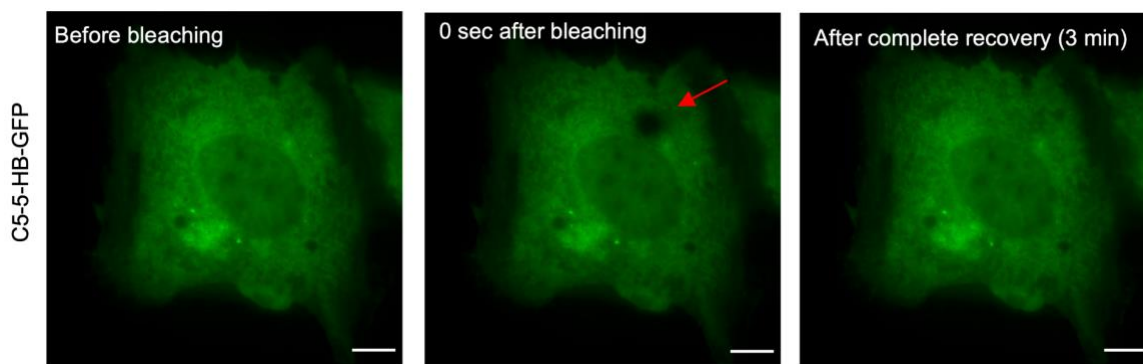

**Figure S7.** Fluorescence recovery after photobleaching (FRAP) experiment of the control C5-5-HB-GFP expressing cells demonstrated a rapid recovery in the absence of a droplet formation.

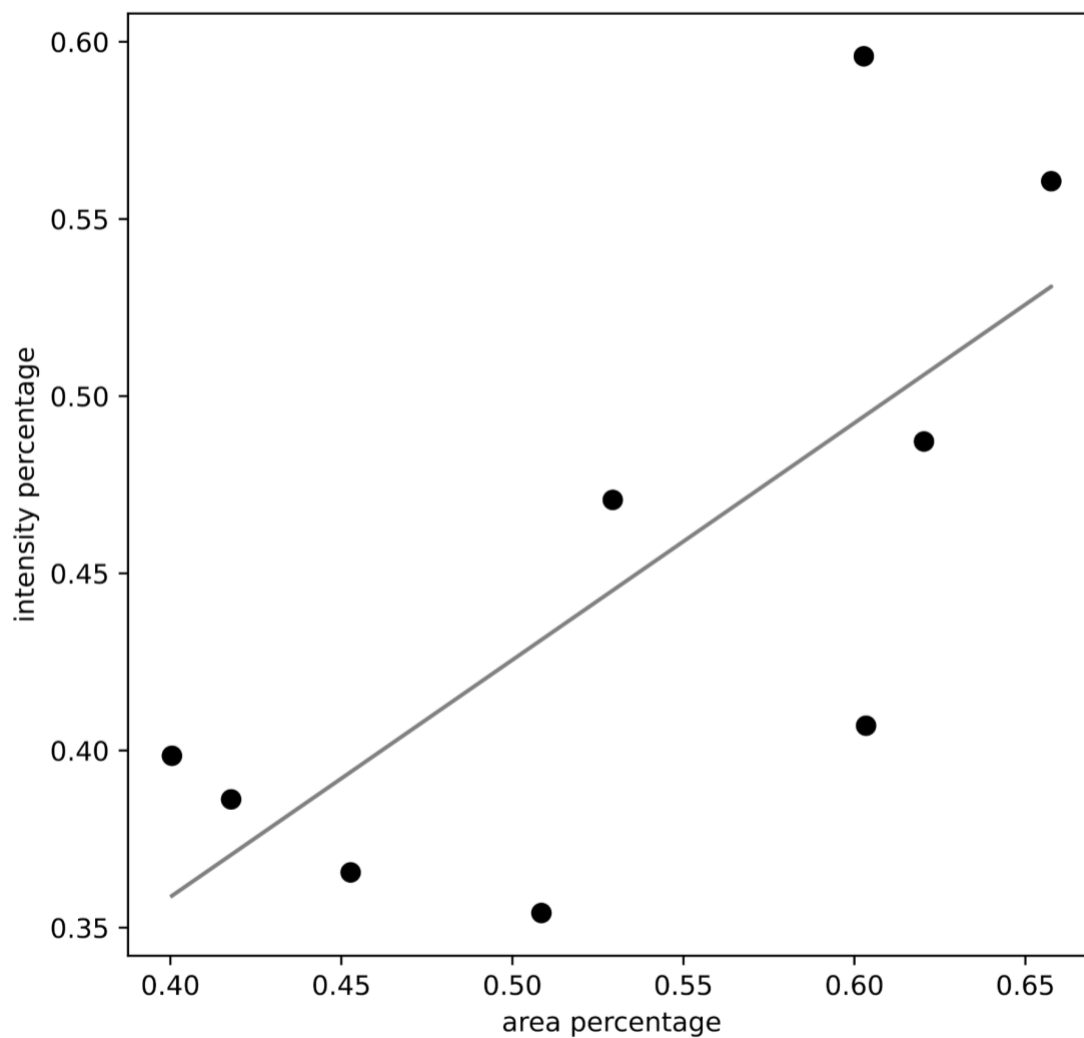



**Figure S8.** Measurement of bleached area versus fluorescence intensity recovery. The x-axis represents the area percentage, measured by taking the ratio of the droplet area pre and post bleach; whereas the y-axis represents the intensity percentage, measured by taking the ratio of full droplet intensity pre-bleach to the intensity post-recovery.

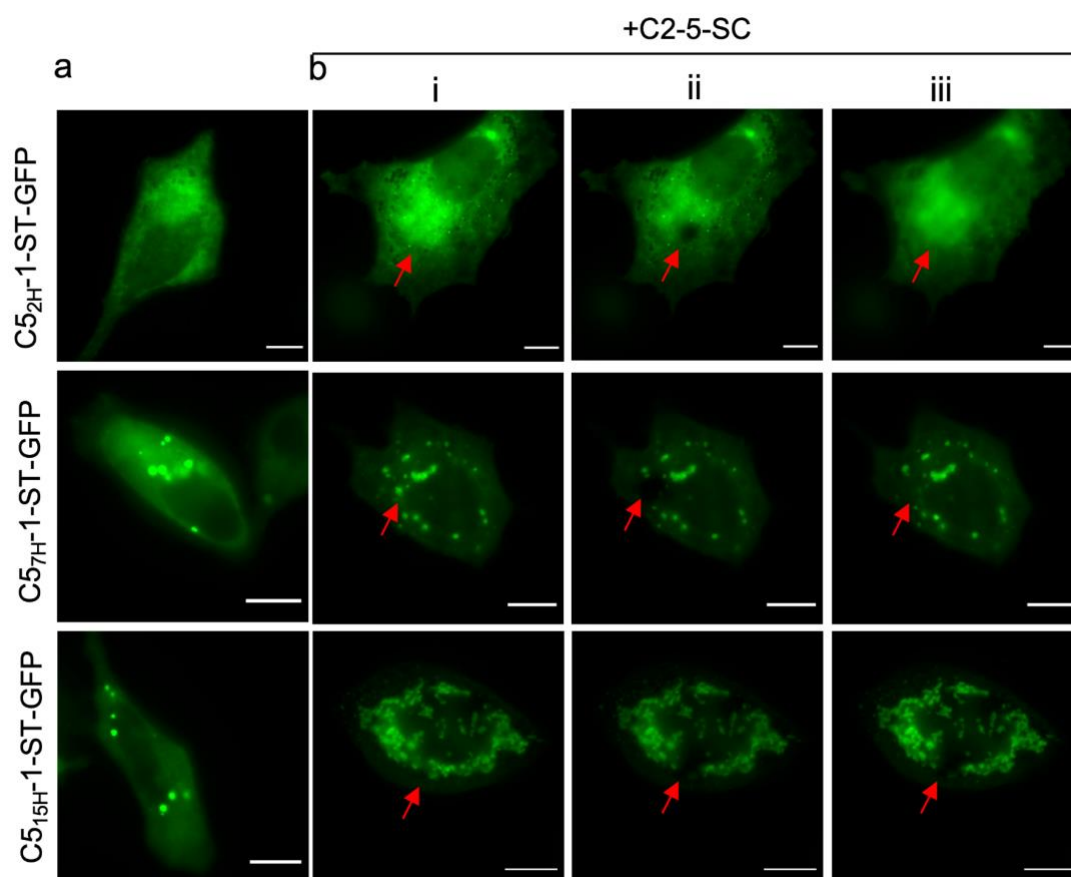

**Figure S9:** Fluorescence recovery after photobleaching (FRAP) experiment of the rigid arm series. a) Expression of C5<sub>2H</sub>-1-ST-GFP, C5<sub>7H</sub>-1-ST-GFP, and C5<sub>15H</sub>-1-ST-GFP constructs alone, or with C2-5-SC (b). (i) Before photobleaching, (ii) right after photobleaching, and (iii) 3 minutes after photobleaching. Scale bar 10  $\mu$ m.

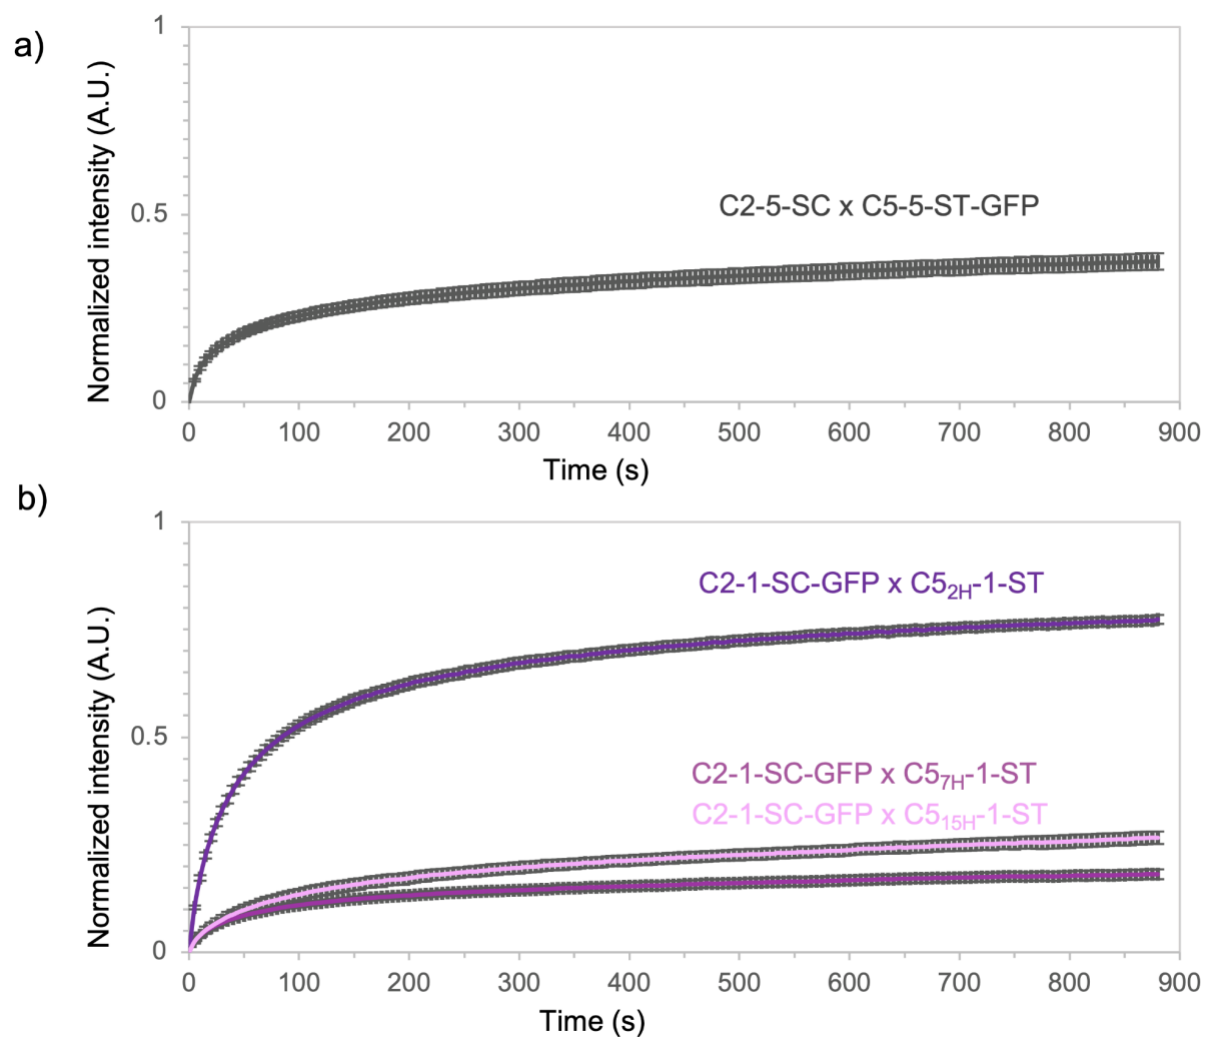

**Figure S10:** Fluorescence recovery after photobleaching (FRAP) experiment of bulk hydrogel formed by a flexible linker (a) and the rigid arm building block series (b). Time-dependent fluorescence recovery plot of covalent bulk hydrogel (*ex cellulo*) of (a) C2-5-SC x C5-5-ST-GFP; and (b) C2-1-SC-GFP x C5<sub>2H</sub>-1-ST; C2-1-SC-GFP x C5<sub>7H</sub>-1-ST; and C2-1-SC-GFP x C5<sub>15H</sub>-1-ST.

## Supplementary Tables

**Table S1.** Coordinates (XYZ) of components comprising C5-5-ST and C2-5-SC models. The radius of each bead of the C5 body is  $1.2\sigma$ , and that of the C2 body is  $0.67\sigma$ . The radius of all other beads is  $0.5\sigma$ . The length of the GGS linker (*i.e.* the number of beads of the GGS linker) can be changed depending on the system.

| C5-5      |        |        |       | C2-5       |         |       |        |
|-----------|--------|--------|-------|------------|---------|-------|--------|
| Type      | x      | y      | z     | Type       | x       | y     | z      |
| C5 body   | 0.000  | -0.002 | 0.000 | C2 anchor  | -5.466  | 0.000 | -0.059 |
| C5 body   | 0.000  | 2.390  | 0.000 | C2 anchor  | 3.934   | 0.000 | -0.059 |
| C5 body   | 0.000  | 4.782  | 0.000 | C2 body    | -4.795  | 0.000 | -0.059 |
| C5 body   | 2.275  | 0.738  | 0.000 | C2 body    | -3.452  | 0.000 | -0.059 |
| C5 body   | 4.550  | 1.477  | 0.000 | C2 body    | -2.109  | 0.000 | -0.059 |
| C5 body   | 1.406  | -1.937 | 0.000 | C2 body    | -0.766  | 0.000 | -0.059 |
| C5 body   | 2.812  | -3.872 | 0.000 | C2 body    | 0.576   | 0.000 | -0.059 |
| C5 body   | -1.406 | -1.937 | 0.000 | C2 body    | 1.919   | 0.000 | -0.059 |
| C5 body   | -2.812 | -3.872 | 0.000 | C2 body    | 3.262   | 0.000 | -0.059 |
| C5 body   | -2.275 | 0.738  | 0.000 | GGS linker | -6.466  | 0.000 | -0.059 |
| C5 body   | -4.550 | 1.477  | 0.000 | GGS linker | -7.466  | 0.000 | -0.059 |
| C5 anchor | 0.000  | 5.978  | 0.000 | GGS linker | -8.466  | 0.000 | -0.059 |
| C5 anchor | 5.687  | 1.846  | 0.000 | GGS linker | -9.466  | 0.000 | -0.059 |
| C5 anchor | 3.515  | -4.840 | 0.000 | GGS linker | -10.466 | 0.000 | -0.059 |
| C5 anchor | -3.515 | -4.840 | 0.000 | GGS linker | 4.934   | 0.000 | -0.059 |
| C5 anchor | -5.687 | 1.846  | 0.000 | GGS linker | 5.934   | 0.000 | -0.059 |

|            |        |        |       |                  |         |        |        |
|------------|--------|--------|-------|------------------|---------|--------|--------|
| GGs linker | 0.000  | 6.978  | 0.000 | GGs linker       | 6.934   | 0.000  | -0.059 |
| GGs linker | 0.000  | 7.978  | 0.000 | GGs linker       | 7.934   | 0.000  | -0.059 |
| GGs linker | 0.000  | 8.978  | 0.000 | GGs linker       | 8.934   | 0.000  | -0.059 |
| GGs linker | 0.000  | 9.978  | 0.000 | SpyCatcher patch | -11.466 | 0.000  | -0.059 |
| GGs linker | 0.000  | 10.978 | 0.000 | SpyCatcher patch | -12.466 | 0.000  | -0.059 |
| GGs linker | 6.638  | 2.155  | 0.000 | SpyCatcher patch | -13.466 | 0.000  | -0.059 |
| GGs linker | 7.589  | 2.464  | 0.000 | SpyCatcher patch | -14.466 | 0.000  | -0.059 |
| GGs linker | 8.540  | 2.773  | 0.000 | SpyCatcher patch | 12.934  | 0.000  | -0.059 |
| GGs linker | 9.492  | 3.082  | 0.000 | SpyCatcher patch | 11.934  | 0.000  | -0.059 |
| GGs linker | 10.443 | 3.391  | 0.000 | SpyCatcher patch | 10.934  | 0.000  | -0.059 |
| GGs linker | 4.103  | -5.649 | 0.000 | SpyCatcher patch | 9.934   | 0.000  | -0.059 |
| GGs linker | 4.691  | -6.458 | 0.000 | SpyCatcher body  | -11.466 | 0.000  | 1.041  |
| GGs linker | 5.278  | -7.267 | 0.000 | SpyCatcher body  | -11.466 | 0.953  | 0.491  |
| GGs linker | 5.866  | -8.076 | 0.000 | SpyCatcher body  | -11.466 | 0.953  | -0.609 |
| GGs linker | 6.454  | -8.885 | 0.000 | SpyCatcher body  | -11.466 | -0.953 | -0.609 |

|            |         |        |       |                 |         |        |        |
|------------|---------|--------|-------|-----------------|---------|--------|--------|
| GGs linker | -4.103  | -5.649 | 0.000 | SpyCatcher body | -11.466 | -0.953 | 0.491  |
| GGs linker | -4.691  | -6.458 | 0.000 | SpyCatcher body | -12.466 | 0.000  | 1.041  |
| GGs linker | -5.278  | -7.267 | 0.000 | SpyCatcher body | -12.466 | 0.953  | 0.491  |
| GGs linker | -5.866  | -8.076 | 0.000 | SpyCatcher body | -12.466 | 0.953  | -0.609 |
| GGs linker | -6.454  | -8.885 | 0.000 | SpyCatcher body | -12.466 | -0.953 | -0.609 |
| GGs linker | -6.638  | 2.155  | 0.000 | SpyCatcher body | -12.466 | -0.953 | 0.491  |
| GGs linker | -7.589  | 2.464  | 0.000 | SpyCatcher body | -13.466 | 0.000  | 1.041  |
| GGs linker | -8.540  | 2.773  | 0.000 | SpyCatcher body | -13.466 | 0.953  | 0.491  |
| GGs linker | -9.492  | 3.082  | 0.000 | SpyCatcher body | -13.466 | 0.953  | -0.609 |
| GGs linker | -10.443 | 3.391  | 0.000 | SpyCatcher body | -13.466 | -0.953 | -0.609 |
| SpyTag     | 0.000   | 11.978 | 0.000 | SpyCatcher body | -13.466 | -0.953 | 0.491  |
| SpyTag     | 0.000   | 12.978 | 0.000 | SpyCatcher body | -14.466 | 0.000  | 1.041  |
| SpyTag     | 0.000   | 13.978 | 0.000 | SpyCatcher body | -14.466 | 0.953  | 0.491  |
| SpyTag     | 0.000   | 14.978 | 0.000 | SpyCatcher body | -14.466 | 0.953  | -0.609 |
| SpyTag     | 11.394  | 3.700  | 0.000 | SpyCatcher body | -14.466 | -0.953 | -0.609 |
| SpyTag     | 12.345  | 4.009  | 0.000 | SpyCatcher body | -14.466 | -0.953 | 0.491  |
| SpyTag     | 13.296  | 4.318  | 0.000 | SpyCatcher body | 12.934  | 0.000  | 1.041  |

|        |         |         |       |                 |        |        |        |
|--------|---------|---------|-------|-----------------|--------|--------|--------|
| SpyTag | 14.247  | 4.627   | 0.000 | SpyCatcher body | 12.934 | 0.953  | 0.491  |
| SpyTag | 7.042   | -9.694  | 0.000 | SpyCatcher body | 12.934 | 0.953  | -0.609 |
| SpyTag | 7.629   | -10.503 | 0.000 | SpyCatcher body | 12.934 | 0.000  | -1.159 |
| SpyTag | 8.217   | -11.312 | 0.000 | SpyCatcher body | 12.934 | -0.953 | -0.609 |
| SpyTag | 8.805   | -12.121 | 0.000 | SpyCatcher body | 12.934 | -0.953 | 0.491  |
| SpyTag | -7.042  | -9.694  | 0.000 | SpyCatcher body | 11.934 | 0.000  | 1.041  |
| SpyTag | -7.629  | -10.503 | 0.000 | SpyCatcher body | 11.934 | 0.953  | 0.491  |
| SpyTag | -8.217  | -11.312 | 0.000 | SpyCatcher body | 11.934 | 0.953  | -0.609 |
| SpyTag | -8.805  | -12.121 | 0.000 | SpyCatcher body | 11.934 | 0.000  | -1.159 |
| SpyTag | -11.394 | 3.700   | 0.000 | SpyCatcher body | 11.934 | -0.953 | -0.609 |
| SpyTag | -12.345 | 4.009   | 0.000 | SpyCatcher body | 11.934 | -0.953 | 0.491  |
| SpyTag | -13.296 | 4.318   | 0.000 | SpyCatcher body | 10.934 | 0.000  | 1.041  |
| SpyTag | -14.247 | 4.627   | 0.000 | SpyCatcher body | 10.934 | 0.953  | 0.491  |
|        |         |         |       | SpyCatcher body | 10.934 | 0.953  | -0.609 |
|        |         |         |       | SpyCatcher body | 10.934 | 0.000  | -1.159 |
|        |         |         |       | SpyCatcher body | 10.934 | -0.953 | -0.609 |
|        |         |         |       | SpyCatcher body | 10.934 | -0.953 | 0.491  |
|        |         |         |       | SpyCatcher body | 9.934  | 0.000  | 1.041  |
|        |         |         |       | SpyCatcher body | 9.934  | 0.953  | 0.491  |
|        |         |         |       | SpyCatcher body | 9.934  | 0.953  | -0.609 |
|        |         |         |       | SpyCatcher body | 9.934  | 0.000  | -1.159 |

|  |  |  |  |                 |       |        |        |
|--|--|--|--|-----------------|-------|--------|--------|
|  |  |  |  | SpyCatcher body | 9.934 | -0.953 | -0.609 |
|  |  |  |  | SpyCatcher body | 9.934 | -0.953 | 0.491  |

## Supplementary Protein Sequences

**Amino acid sequence:** **Yellow:** linker; **Red:** SpyCatcher; **Blue:** SpyTag; **Orange:** LHD101A (HA); **Purple:** LHD101B (HB); **Green:** Fluorescent protein

### Covalent:

#### >C2-GGS-SpyCatcher (C2-1-SC)

**M**GTREEIIRELARSLAEQAELTARLERLLRELERLQREGSSDEDVRELLREIKELVREILKLIAEQILLI  
AELLAAIRSEAAELALRAIREAIELCKRSTDEELCQLLLRLALLLMEALLLYPDSEAAKLALKAALAEAI  
ELCKQSTDEELCEELVKLAQKLIELAKRYPDSEAAKLALKAALAEAIELCKQSTDEELCEELVKLAQKLI  
LAKRYPDSEAAKRALKEAKELIEQCKESTDEDECRELVKRAEELIREAKE**GGSDSATHIKFSKRIDGKE**  
**L**AGATMELRDSSGKTISTWISDGQVKDFYLMPGKYTFVETAAPDGYEIATAITFTVNEQGQVTVNGKATK  
**G**GSWGLEHHHHHH

#### >C2-(GGS)<sub>5</sub>-SpyCatcher (C2-5-SC)

**M**GTREEIIRELARSLAEQAELTARLERLLRELERLQREGSSDEDVRELLREIKELVREILKLIAEQILLI  
AELLAAIRSEAAELALRAIREAIELCKRSTDEELCQLLLRLALLLMEALLLYPDSEAAKLALKAALAEAI  
ELCKQSTDEELCEELVKLAQKLIELAKRYPDSEAAKLALKAALAEAIELCKQSTDEELCEELVKLAQKLI  
LAKRYPDSEAAKRALKEAKELIEQCKESTDEDECRELVKRAEELIREAKE**GGSGSGSGSGSGSDSATH**  
**I**KFSKRIDGKELAGATMELRDSSGKTISTWISDGQVKDFYLMPGKYTFVETAAPDGYEIATAITFTVNE  
**Q**QGQVTVNGKATK**G**GSWGLEHHHHHH

#### >C5-(GGS)<sub>1</sub>-SpyTag (C5-1-ST)

**M**GHHHHHHGWSGAHIVMVDAYKPTK**GG**SNDKEKELKELLKRAEELAKSPDPEDLKEAVRLAEVVRERPG  
SNLAKKALEIILRAAEELAKLPDPEALKEAVKAAEKVVREQPGSNLAKKAQEIILRAAEELAKLEDEEAL  
KEAIKAAEKVIELEPGSELAKEAKRIIEKAAKMLADILRKEMEKIREETEEVKKEIEESKKRPQSESAN  
LILIMQLLINQIRLLALQIRMLVLQLIL

#### >C5-(GGS)<sub>5</sub>-SpyTag (C5-5-ST)





>I53-(GGG)<sub>1</sub>-SpyTag\_chainB (I53-1-ST\_chainB)

MEEAELAYLLGELAYKLGEYRIAIRAYRIALKRDPNNAEAWYNLGNAYYKQGRYREAIEYYQKALELDPN  
 NAEAWYNLGNAYYERGEYEEAIEYYRKALRLDPNNADAMQNLLNAKMREEGGSAHIVMVDAYKPTKGSWG  
 LEHHHHHH

>I53-(GGG)<sub>5</sub>-SpyTag\_chainB (I53-5-ST\_chainB)

MEEAELAYLLGELAYKLGEYRIAIRAYRIALKRDPNNAEAWYNLGNAYYKQGRYREAIEYYQKALELDPN  
 NAEAWYNLGNAYYERGEYEEAIEYYRKALRLDPNNADAMQNLLNAKMREEGGSGSGSGSGSGSAHIVM  
 VDAYKPTKGSWGLEHHHHHH

>I53-(GGG)<sub>10</sub>-SpyTag\_chainB (I53-10-ST\_chainB)

MEEAELAYLLGELAYKLGEYRIAIRAYRIALKRDPNNAEAWYNLGNAYYKQGRYREAIEYYQKALELDPN  
 NAEAWYNLGNAYYERGEYEEAIEYYRKALRLDPNNADAMQNLLNAKMREEGGSGSGSGSGSGSGSGG  
 SGGSGSGSGSAHIVMVDAYKPTKGSWGLEHHHHHH

>C5<sub>2H</sub>-(GGG)<sub>1</sub>-SpyTag (C5<sub>2H</sub>-1-ST)

MGHHHHHHGWSGAHIVMVDAYKPTKGGSTRRKQEMKRLKKEMEKIREETEEVKKEIEESKKRPQSES  
 AKNLILIMQLLINQIRLLALQIRMLALQLQE

>C5<sub>7H</sub>-(GGG)<sub>1</sub>-SpyTag (C5<sub>7H</sub>-1-ST)

MGHHHHHHGWSGAHIVMVDAYKPTKGGSDLQEVADRIVEQLKREGRSPPEARKEARRLIEEIKQSAGGD  
 SELIEVAVRIVKFLEEAGMSPSEAAKVAVELIERIRRAAGDSELIEKAVRIVRRLERRGLSPA  
 EAAKIAVAIIAAEVLRSREAEKIREETEEVKKEIEESKKRPQSES  
 AKNLILIMQLLINQIRLLALQIQMLRLQLEL

>C5<sub>15H</sub>-(GGG)<sub>1</sub>-SpyTag (C5<sub>15H</sub>-1-ST)

MGHHHHHHGWSGAHIVMVDAYKPTKGGSDLQEVADRIVEQLKREGRSPPEARKEARRLIEEIKQSAGGD  
 SELIEVAVRIVKELEEQGRSPSEAAKEAVELIERIRRAAGDSELIEVAVRIVKELEEQGRSPSEAAKEA  
 VELIERIRRAAGDSELIEVAVRIVKELEEQGRSPSEAAKEAVELIERIRRAAGDSELIEVAVRIVKEL  
 EEQGRSPSEAAKEAVELIERIRRAAGDSELIEVAVRIVKFLEEAGMSPSEAAKVAVELIERIRRAAGD  
 SELIEKAVRIVRRLERRGLSPA  
 EAAKIAVAIIAAEVLRSREAEKIREETEEVKKEIEESKKRPQSES  
 AKNLILIMQLLINQIRLLALQIQMLRLQLEL

**Noncovalent:**>C2-(GGG)<sub>5</sub>-LHD101A (C2-5-HA)

MGTREEIIRELARSLAEQAELTARLERLLRELERLQREGSSDEDVRELLREIKELVREILKLI  
 AEQILLIAELLAAIRSEAAELALRAIREAIELCKRSTDEELCQLLLRLALLLME  
 LALLYPDSEAAKLALKA  
 ALEAIELCKQSTDEELCEELVKLAQKLI  
 ELAKRYPDSEAAKLALKA  
 ALEAIELCKQSTDEELCEELVKLAQKLI

LAKRYPDSEEAKRALKEAKELIEQCKESTDEDECRELVKRAEELIREAKEGGSGGSGGSGGSGGSGRQEK  
 VLKSIETVRKMGVTMETHRSGNEVKVVIKGLHIKQQRQLYRDVRETSKKQGVETEIEVEGDTVTIVVRE  
 GSWGLEHHHHHH

### >C5-(GGG)<sub>5</sub>-LHD101B (C5-5-HB)

MGHHHHHHGWSGGRQEKVLKSIETVRKMGVTMETHRSGNEVKVVIKGLHESQQEQILLEDVLRTAEKQGV  
 RVRIRFKGDTVTIVVREGGSGGSGGSGGSGGSGNDEKEKLKELLKRAEELAKSPDPEDLKEAVRLAEVVR  
 ERPGSNLAKKALEIILRAAEELAKLPDPEALKEAVKAAEKVVREQPGSNLAKKAQEIILRAAEELAKLED  
 EEALKEAIKAAEKVIELEPGSELAKEAKRIIEKAAKMLADILRKEMEKIREETEEVKKEIEESKKRPQSE  
 SAKNLILIMQLLINQIRLLALQIRMLVLQLIL

### GFP/mCherry fusion proteins:

#### >C5-(GGG)<sub>5</sub>-SpyTag-GFP (C5-5-ST-GFP)

MSKGEEELFTGVVPIIVELDGDVNGHKFSVSGEGEGDATYGKLTCLKFICTTGKLPVPWPTLVTTLTYGVC  
 FSRYPDHMKQHDFFKSAMPEGYVQERTIFFKDDGNYKTRAEVKFEGDTLVNRIELKGIIDFKEDGNIILGHK  
 LEYNYNSHNVIIMADKQKNGIKVNFKIRHNIEDGSVQLADHYQQNTPIGDGPVLLPDNHYLSTQSALSKD  
 PNEKRDHMLLEFVTAAGITLGMDELYKGGSGGSGGSGGSGGSAHIVMVDAYKPTKGGSGGSGGSGGSGG  
 SNDEKEKLKELLKRAEELAKSPDPEDLKEAVRLAEVVRERPGSNLAKKALEIILRAAEELAKLPDPEAL  
 KEAVKAAEKVVREQPGSNLAKKAQEIILRAAEELAKLEDEEALKEAIKAAEKVIELEPGSELAKEAKRII  
 EKAAMMLADILRKEMEKIREETEEVKKEIEESKKRPQSESANLILIMQLLINQIRLLALQIRMLVLQLI  
 L

#### >C5-(GGG)<sub>5</sub>-LHD101B-GFP (C5-5-HB-GFP)

MSKGEEELFTGVVPIIVELDGDVNGHKFSVSGEGEGDATYGKLTCLKFICTTGKLPVPWPTLVTTLTYGVC  
 FSRYPDHMKQHDFFKSAMPEGYVQERTIFFKDDGNYKTRAEVKFEGDTLVNRIELKGIIDFKEDGNIILGHK  
 LEYNYNSHNVIIMADKQKNGIKVNFKIRHNIEDGSVQLADHYQQNTPIGDGPVLLPDNHYLSTQSALSKD  
 PNEKRDHMLLEFVTAAGITLGMDELYKGGSGGSGGSGGSGGSGRQEKVLKSIETVRKMGVTMETHRSG  
 NEVKVVIKGLHESQQEQILLEDVLRTAEKQGVVRIRIRFKGDTVTIVVREGGSGGSGGSGGSGGSGNDEKEKL  
 KELLKRAEELAKSPDPEDLKEAVRLAEVVRERPGSNLAKKALEIILRAAEELAKLPDPEALKEAVKAAE  
 KVVREQPGSNLAKKAQEIILRAAEELAKLEDEEALKEAIKAAEKVIELEPGSELAKEAKRIIEKAAKMLA  
 DILRKEMEKIREETEEVKKEIEESKKRPQSESANLILIMQLLINQIRLLALQIRMLVLQLIL

#### >C2-GGS-SpyCatcher-mCherry (C2-1-SC-mCherry)

MGTREEIIRELARSLAEQAELTARLERLLRELERLQREGSSDEDVRELLREIKELVREILKLI AEQILLI  
 AELLAAIRSEAAELALRAIREAIELCKRSTDEELCQLLLRLALLMELALLYPDSEAAKLALKAALAEAI  
 ELCKQSTDEELCEELVKLAQKLI ELAKRYPDSEAAKLALKAALAEAI ELCKQSTDEELCEELVKLAQKLI  
 LAKRYPDSEEAKRALKEAKELIEQCKESTDEDECRELVKRAEELIREAKEGGSDSATHIKFSKRDI DGKE  
 LAGATMELRDSGKTISTWISDGQVKDFYLMPGKYTFVETAAPDGYEIAITAITFTVNEQGQVTVNGKATK

GGSGSGSGSGSGSVSKGEEDNMAIIKEFMRFKVHMEGSVNGHEFEIEGEGEGRPYEGTQTAKLKVTK  
 GGPLPFAWDILSPQFMYGSKAYVKHPADIPDYLLKLSFPEGFKWERVMNFEDGGVVTVTQDSSLQDGEFIY  
 KVKLRGTNFPDGPVMQKKTMGWEASSERMYPEDGALKGEIKQRLKLDGGHYDAEVKTTYKAKKPVQLP  
 GAYNVNIKLDITSHNEDYTIVEQYERAEGRHSTGGMDELYK

#### >C5<sub>2H</sub>-GGG-SpyTag-GFP (C5<sub>2H</sub>-1-ST-GFP)

MSKGEELFTGVVPIIIVELDGDVNGHKFSVSGEGEGDATYGKLTCLKFICTTGKLPVPWPTLVTTTLTYGVQC  
 FSRYPDHMKQHDFFKSAMPEGYVQERTIFFKDDGNYKTRAEVKFEGDTLVNRIELKIDFKEDGNIILGHK  
 LEYNYNSHNVIYIMADKQKNGIKVNFKIRHNIEDGSVQLADHYQQNTPIGDGPVLLPDNHYLSTQSALSKD  
 PNEKRDHMLLEFVTAAGITLGMDELYKGGSGSGSGSGSGSAHIVMVDAYKPTKGGSTRRKQEMKRLK  
 KEMEKIREETEEVKKEIEESKKRPQSESANKLILIMQLLINQIRLLALQIRMLALQLQE

#### >C5<sub>7H</sub>-GGG-SpyTag-GFP (C5<sub>7H</sub>-1-ST-GFP)

MSKGEELFTGVVPIIIVELDGDVNGHKFSVSGEGEGDATYGKLTCLKFICTTGKLPVPWPTLVTTTLTYGVQC  
 FSRYPDHMKQHDFFKSAMPEGYVQERTIFFKDDGNYKTRAEVKFEGDTLVNRIELKIDFKEDGNIILGHK  
 LEYNYNSHNVIYIMADKQKNGIKVNFKIRHNIEDGSVQLADHYQQNTPIGDGPVLLPDNHYLSTQSALSKD  
 PNEKRDHMLLEFVTAAGITLGMDELYKGGSGSGSGSGSGSAHIVMVDAYKPTKGGSDLQEVADRIV  
 EQLKREGRSPPEARKEARLIEEIKQSAGGSELIEVAVRIVKFLLEEAGMSPSEAAKVAVELIERIRRAA  
 GGSELIEKAVRIVRRLERRGLSPAEEAKIAVAIIAAEVLSREAEEKIREETEEVKKEIEESKKRPQSESA  
 KNLILIMQLLINQIRLLALQIQMLRLQLEL

#### >C5<sub>15H</sub>-GGG-SpyTag-GFP (C5<sub>15H</sub>-1-ST-GFP)

MSKGEELFTGVVPIIIVELDGDVNGHKFSVSGEGEGDATYGKLTCLKFICTTGKLPVPWPTLVTTTLTYGVQC  
 FSRYPDHMKQHDFFKSAMPEGYVQERTIFFKDDGNYKTRAEVKFEGDTLVNRIELKIDFKEDGNIILGHK  
 LEYNYNSHNVIYIMADKQKNGIKVNFKIRHNIEDGSVQLADHYQQNTPIGDGPVLLPDNHYLSTQSALSKD  
 PNEKRDHMLLEFVTAAGITLGMDELYKGGSGSGSGSGSGSAHIVMVDAYKPTKGGSDLQEVADRIV  
 EQLKREGRSPPEARKEARLIEEIKQSAGGSELIEVAVRIVKELEEQGRSPSEAAKEAVELIERIRRAA  
 GGSELIEVAVRIVKELEEQGRSPSEAAKEAVELIERIRRAAGGSELIEVAVRIVKELEEQGRSPSEAA  
 KEAVELIERIRRAAGGSELIEVAVRIVKELEEQGRSPSEAAKEAVELIERIRRAAGGSELIEVAVRIV  
 KFLEEAGMSPSEAAKVAVELIERIRRAAGGSELIEKAVRIVRRLERRGLSPAEEAKIAVAIIAAEVLSR  
 EAEKIREETEEVKKEIEESKKRPQSESANKLILIMQLLINQIRLLALQIQMLRLQLEL

#### >C2-(GGG)<sub>5</sub>-LHD101A-mCherry (C2-5-HA-mCherry)

MGTREEIIRELARSLAEQAELTARLERLLRELERLQREGSSDEDVRELLREIKELVREILKLIQILLI  
 AELLAAIRSEAAELALRAIREAIELCKRSTDEELCQLLLRLALLLMEALALYPDSEAAKLALKAALAEAI  
 ELCKQSTDEELCEELVKLAQKLIELAKRYPDSEAAKLALKAALAEAIELCKQSTDEELCEELVKLAQKLI  
 LAKRYPDSEAAKRALKEAKELIEQCKESTDEDECRELVKRAEELIREAKEGGSGSGSGSGSGGRQEK  
 VLKSIETVRKMGVTMETHRSGNEVKVVIKGLHIKQQRQLYRDVRETSKKQGVETEIEVEGDTVTVVRE  
 GSGSGSGSGSGSGSVSKGEEDNMAIIKEFMRFKVHMEGSVNGHEFEIEGEGEGRPYEGTQTAKLKVTKG  
 GPLPFAWDILSPQFMYGSKAYVKHPADIPDYLLKLSFPEGFKWERVMNFEDGGVVTVTQDSSLQDGEFIYK  
 VKLRGTNFPDGPVMQKKTMGWEASSERMYPEDGALKGEIKQRLKLDGGHYDAEVKTTYKAKKPVQLPG  
 AYNVNIKLDITSHNEDYTIVEQYERAEGRHSTGGMDELYK

>C5-(GGG)<sub>5</sub>-LHD101B-Lifeact-GFP (C5-5-HB-Lifeact-GFP) [Lifeact in cyan]

MGVADLIKKFESISKEEGDPPVATMVSKEELFTGVVPIVVELDGDVNGHKFSVSGEGEGDATYGKLTLLK  
 FICTTGKLPVPWPTLVTTTLTYGVQCFSRYPDHMKQHDFFKSAMPEGYVQERTIFFKDDGNYKTRAEVKFE  
 GDTLVNRIELKIDFKEDGNIILGHKLEYNFNHNVYITADKQKNGIKANFKIRHNVEDGVSQVLADHYQQN  
 TPIGDGPVLLPDNHYLSTQSVLSKDPNEKRDMVLEFVTAAGITHGMDELYKGGSGSGSGSGSGSGS  
 GRQEKVLKSI EETVRKMGVTMETHRSGNEVKVVIKGLHESQQEQLLLEDVLRTAEKQGVVRVIRFKGDTVTIV  
 VREGGSGSGSGSGSGSGSNDEKEKLLKELLKRAEELAKSPDPEDLKEAVRLAEVVRERPGSNLAKKALEI  
 ILRAAEELAKLPDPEALKEAVKAAEKVVREQPGSNLAKKAQEII LRAAEELAKLEDEEALKEAIKAAEKV  
 IELEPGSELAKEAKRIIEKAAKMLADILRKEMEKIREEVEVKKEIEESKKRPQSESANLILIMQLLIN  
 QIRLLALQIRMLVLQLIL

>C2-GGS-SpyCatcher-GFP (C2-1-SC-GFP) (bacterial expression)

MGTREEIIRELARSLAEQAELTARLERLLRELERLQREGSSDEDVRELLREIKELVREILKLI AEQILLI  
 AELLLAAIRSEAAELALRAIREAIELCKRSTDEELCQLLLRLALLLMEALLLYPDSEAAKLALKALEAI  
 ELCKQSTDEELCEELVKLAQKLI ELAKRYPDSEAAKLALKALEAIELCKQSTDEELCEELVKLAQKLI  
 LAKRYPDSEAAKRALKEAKELIEQCKESTDEDECRELVKRAEELIREAKEGGSDSATHIKFSKRDI DGKE  
 LAGATMELRDSGKTISTWISDGQVKDFYLMPGKYTFVETAAPDGYEIAATAITFTVNEQGQVTVNGKATK  
 GGGSGSGSGSGSGSGSMKSGEELFTGVVPIVVELDGDVNGHKFSVRGEGEGDATNGKLTLLKFICTTGKLP  
 VPWPTLVTTTLTYGVQCFAFYPDHMKQHDFFKSAMPEGYVQERTISFKDDGTYKTRAEVKFEGDTLVNRIE  
 LKIDFKEDGNIILGHKLEYNFNHNVYITADKQKNGIKANFKIRHNVEDGVSQVLADHYQQNTPIGDGPVL  
 LPDNHYLSTQSVLSKDPNEKRDMVLEFVTAAGITHGMDELYKLEHHHHHH

>C5-(GGG)<sub>5</sub>-SpyTag-GFP (C5-5-ST-GFP) (bacterial expression)

MSKGEELFTGVVPIVVELDGDVNGHKFSVRGEGEGDATNGKLTLLKFICTTGKLPVPWPTLVTTTLTYGVQC  
 FARYPDHMKQHDFFKSAMPEGYVQERTISFKDDGTYKTRAEVKFEGDTLVNRIELKIDFKEDGNIILGHK  
 LEYNFNHNVYITADKQKNGIKANFKIRHNVEDGVSQVLADHYQQNTPIGDGPVLLPDNHYLSTQSVLSK  
 PNEKRDMVLEFVTAAGITHGMDELYKGGSGSGSGSGSGSGSAHIVMVDAYKPTKGGSGSGSGSGSGSG  
 SNDEKEKLLKELLKRAEELAKSPDPEDLKEAVRLAEVVRERPGSNLAKKALEIILRAAEELAKLPDPEAL  
 KEAVKAAEKVVREQPGSNLAKKAQEII LRAAEELAKLEDEEALKEAIKAAEKVIELEPGSELAKEAKRII  
 EKAAKMLADILRKEMEKIREEVEVKKEIEESKKRPQSESANLILIMQLLINQIRLLALQIRMLVLQLI  
 LLEHHHHHH
